# Supplementary material
Source: Springer Nature journal article supplement (https://www.springermedizin.de/resource/supplementary/13002_2009_173_MOESM5_ESM.pdf/9627314)

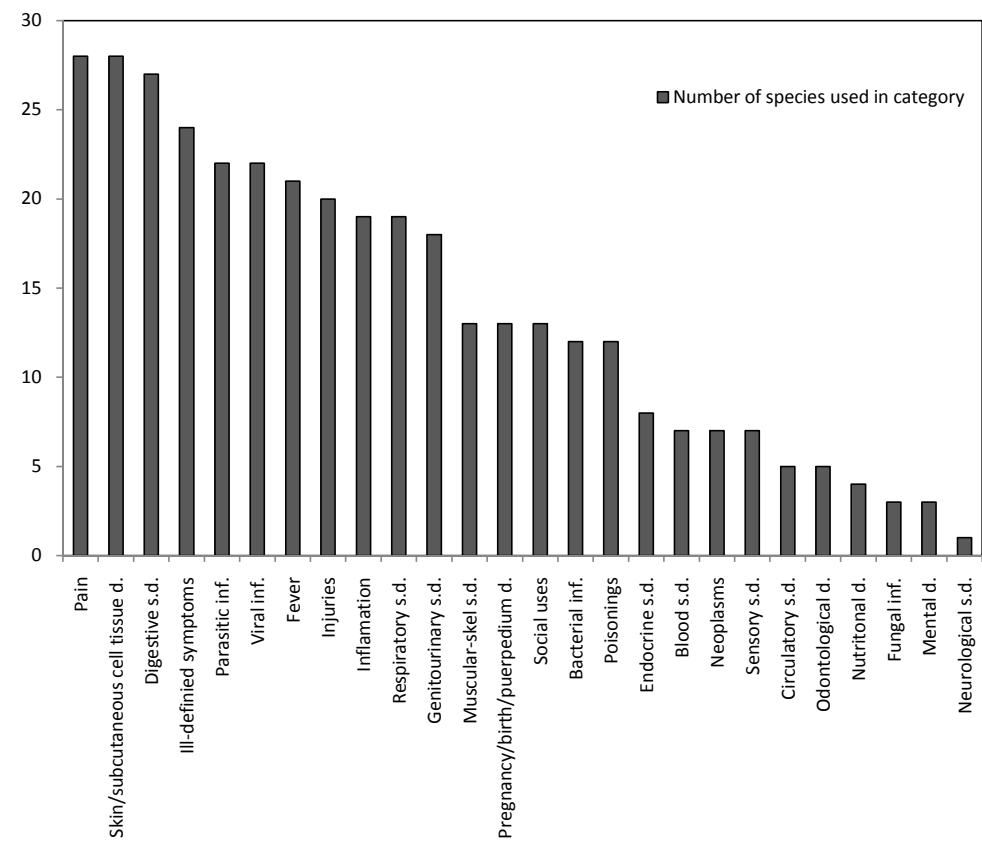

Supplement: MOESM5 [file 9627314]
